# Supplementary material for: Solvent-driven isomerization of cis,cis-muconic acid for the production of specialty and performance-advantaged cyclic biobased monomers
Source: Royal Society of Chemistry journal article supplement (doi:10.1039/d0gc02108c), 2020-01-01
Supplement: d0gc02108c1.pdf [file d0gc02108c1.pdf]

## Supplementary Information

### Solvent-driven isomerization of *cis,cis*-muconic acid for the production of specialty and performance-advantaged cyclic biobased monomers

Jack M. Carraher,<sup>a,b,‡</sup> Prerana Carter,<sup>a,b,‡</sup> Radhika G. Rao,<sup>a,b</sup> Michael J. Forrester,<sup>a</sup> Toni Pfennig,<sup>a,b</sup> Brent H. Shanks,<sup>a,b</sup> Eric W. Cochran,<sup>a</sup> and Jean-Philippe Tessonnier\*<sup>a,b</sup>

<sup>a</sup> Dept. of Chemical and Biological Engineering, Iowa State University, Ames, IA 50011, USA.

<sup>b</sup> Center for Biorenewable Chemicals (CBiRC), Ames, IA 50011, USA.

<sup>‡</sup> These authors contributed equally to this work.

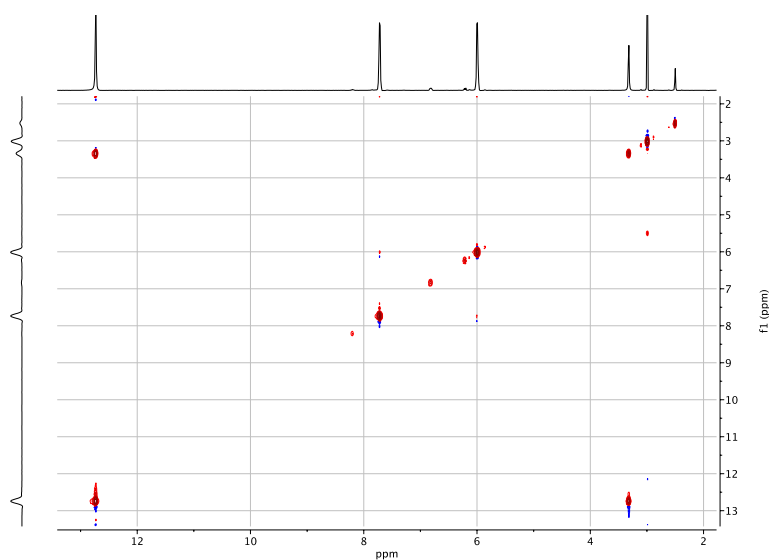

**ESI 1.** NOESY NMR spectrum indicating water interactions with carboxyl moieties in MA.

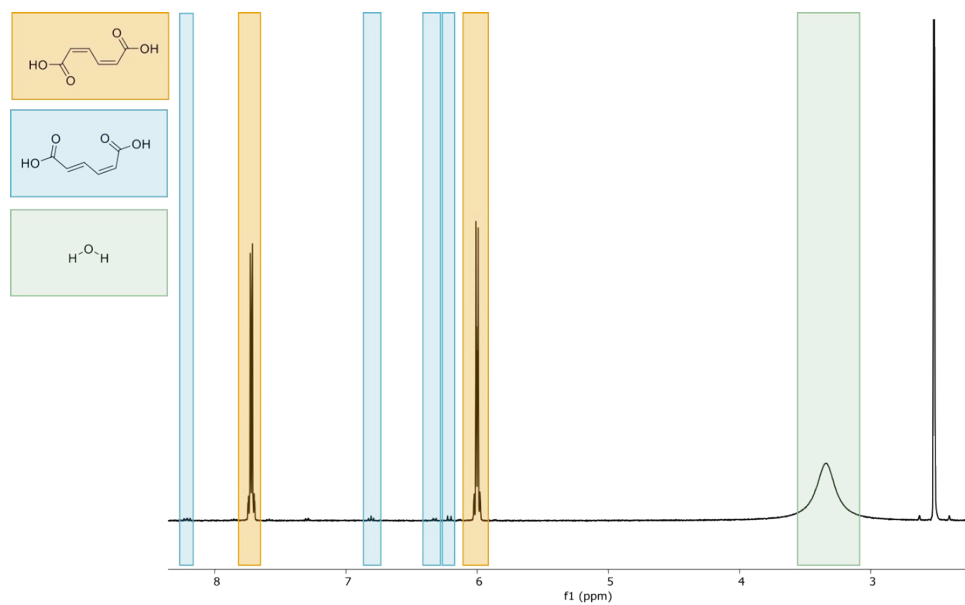

**ESI 2.**  $^1\text{H}$  NMR spectrum of biobased *cc*MA in  $\text{DMSO-d}_6$  obtained after filtration of fermentation broth over activated carbon followed by precipitation using sulfuric acid, rinsing, and drying.

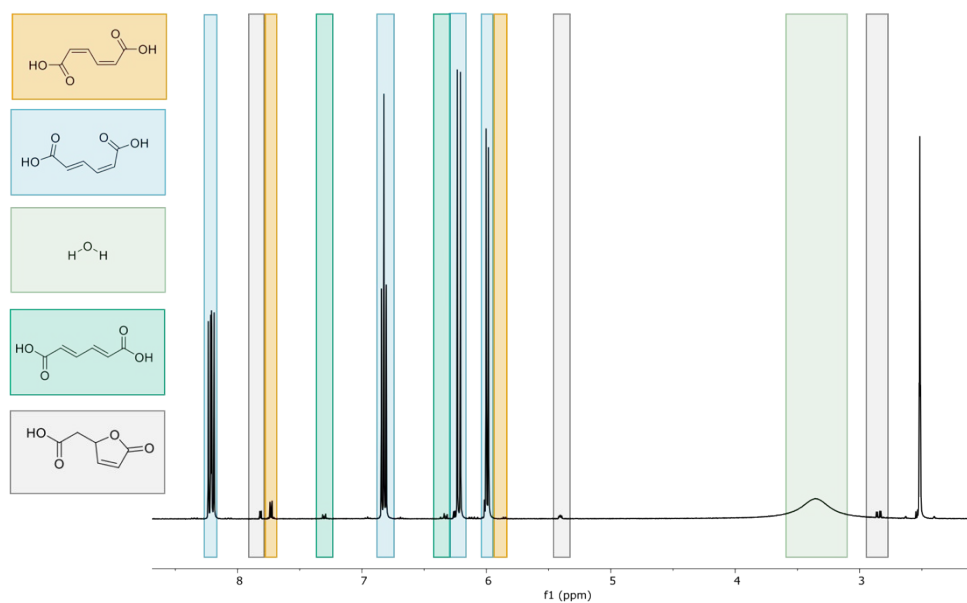

**ESI 3.**  $^1\text{H}$  NMR spectrum of biobased *ct*MA in  $\text{DMSO-d}_6$  obtained through isomerization of biologically-produced *cc*MA. Residual sulfuric acid from the initial separation-purification of *cc*MA catalyzed the lactonization of *cc*MA during the isomerization to *ct*MA.

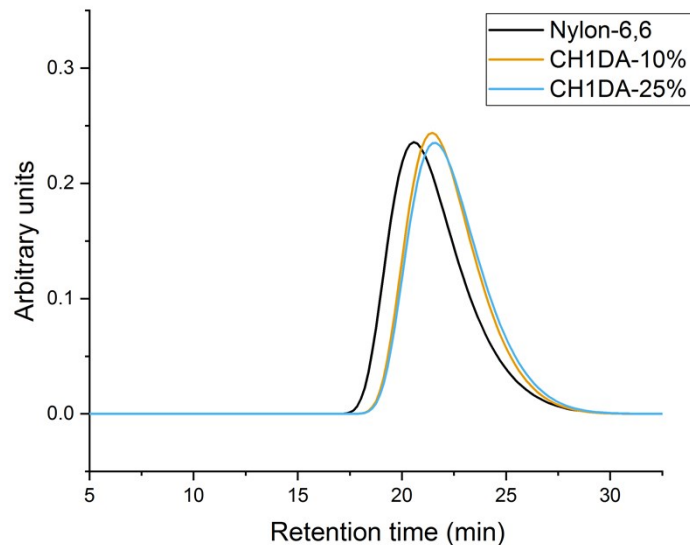

**ESI 4.** Gel-permeation chromatograms (GPC) of cyclo-aliphatic polyamides were carried out in hexafluoroisopropanol (HFIP) with respect to poly(methyl methacrylate) standards fitted to Nylon-6,6 standards purchased from American Polymer Standards. A Tosoh Ecosec HLC-8320GPC equipped with RI and UV detectors was used to determine the molecular weight of each sample. The GPC column included a Tosoh TSKgel SuperH6000 (150 x 6.0 mm) in series with two Agilent PL HFIPgel columns (250 x 4.6 mm). HFIP was used as the eluent in combination with sodium trifluoroacetate to prevent sample aggregation at a concentration of 0.02 mol/L HFIP (1.7 g/kg HFIP). Each sample had an injection volume of 10  $\mu$ L and was analyzed at 45  $^{\circ}$ C under a 0.3 mL/min flow rate.

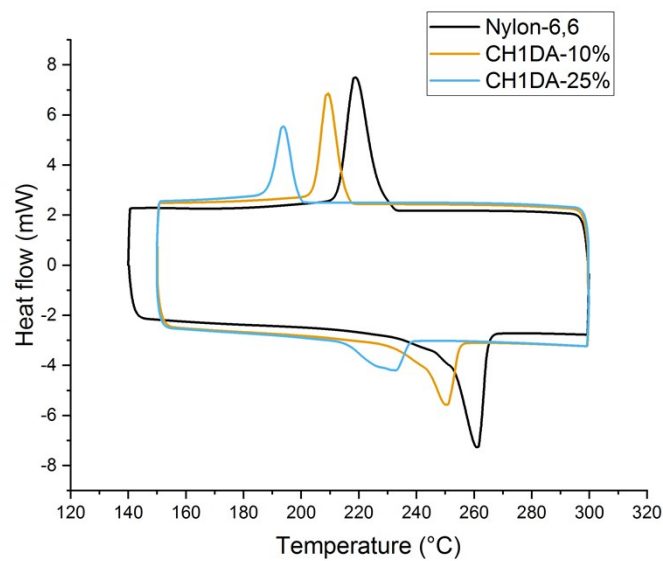

**ESI 5.** Differential scanning calorimetry (DSC) measurements of the synthesized polyamides were carried out with sample sizes of around 5 mg using a TA Q100 instrument. Samples were held isothermally at 150 °C for 2 minutes, heated to 300°C, and cooled back down at 10 K/min and repeated thrice. Results shown here are for the 3<sup>rd</sup> cycle.

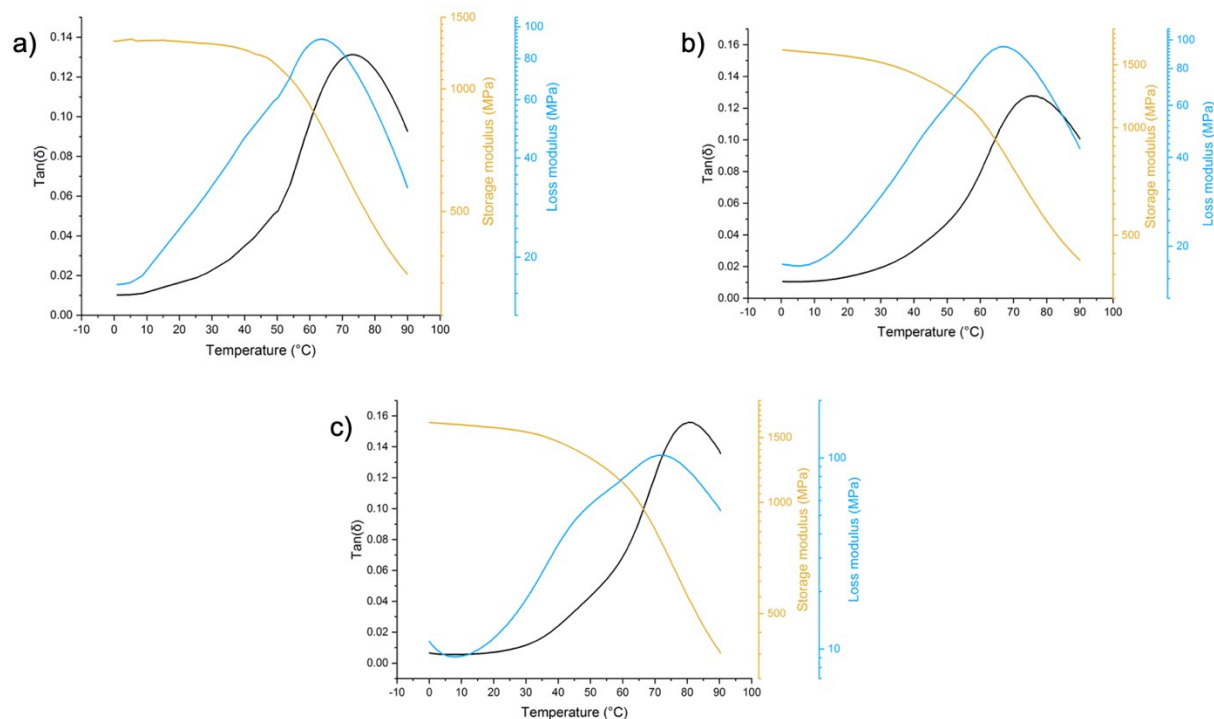

**ESI 6.** Dynamic Mechanical Analysis (DMA) of polyamide series with varying CH1DA incorporation: (a) Nylon-6,6 (b) CH1DA-10% (c) CH1DA-25%. DMA specimens were prepared by injection molding with a Haake MiniLab extruder into ISO 527-2-1BB model, followed by annealing for 6 h at 150 °C. DMA experiments were conducted using a TA Ares G2 in torsion mode heating at 5 °C min<sup>-1</sup> from 0 to 90 °C in the linear viscoelastic regime at  $\omega = 10$  rad s<sup>-1</sup>.

### *Isomerization of biobased ccMA*

Biologically-produced *ccMA* was recovered from a high-titer fermentation broth at neutral pH. In addition to muconate, the broth contained a range of biogenic impurities, unreacted sugars, and inorganic salts. 200 ml of broth were first filtered over 20 g of activated carbon (DARCO® KB-WJ) to remove the organic impurities that give the broth its characteristic brown color. A clear solution was recovered and *ccMA* was subsequently precipitated by acidifying the filtrate using 5 M sulfuric acid until reaching pH 0. *ccMA* was filtered, rinsed with 10 ml of 5 M sulfuric acid, and dried at room temperature overnight. The sample was further isomerized to *ctMA* using the same procedure as for commercial, high-purity, *ccMA*.

### *Hydrogenation of CH1DA*

CH1DA was esterified with methanol in the presence of  $\text{H}_2\text{SO}_4$  to obtain cyclohex-2-ene-1,4-dimethyl ester (CH2DAME2) (>94% yield). This esterification resolved the solubility challenges that were due to CH1DA, thereby facilitating the hydrogenation step. The hydrogenation was then performed in a stainless-steel three-phase plug flow reactor using 10 mg of 5% Pt/C catalyst, diluted with 100 mg of glass beads (45–90  $\mu\text{m}$ ). The reaction was conducted at 250 °C and 20  $\text{ml min}^{-1}$  of gas flow. The reaction temperature was maintained using a PID controller and the gas flow was regulated using a Brooks SLA5850 flow controller. The reactor was operated in an up-flow configuration, and the reactant dissolved in dioxane (11.4  $\text{mg ml}^{-1}$ ) was pumped at 0.4  $\text{ml min}^{-1}$  using a Lab Alliance Series I HPLC pump. Product samples were collected every 15 minutes and were analyzed using  $^1\text{H}$  NMR. The corresponding saturated ester (CHDAME2) was obtained with 92% yield at 97% conversion.
